# Supplementary material
Source: PubMed Central journal article supplement (PMC6235689)
Supplement: NIHMS994706-supplement-supplemental.pdf [file NIHMS994706-supplement-supplemental.pdf]

**Supplementary Table 1. Protein-altering biallelic variants shared by two patients in Family 1.**

| <b>Chromosome Coordinate (hg19)</b> | <b>Change</b> | <b>Genotype</b> | <b>Gene</b>     | <b>Variant type</b> | <b>Reason for exclusion</b> |
|-------------------------------------|---------------|-----------------|-----------------|---------------------|-----------------------------|
| Chr9: 80868198                      | G > A         | Homo            | <i>CEP78</i>    | Sp                  | /                           |
| Chr10: 32860815                     | A > T         | Homo            | <i>CCDC7</i>    | Ns                  | LoF                         |
| Chr1: 175129955                     | G > T         | Homo            | <i>KIAA0040</i> | Ns                  | Con                         |
| Chr1: 900519                        | A > G         | Homo            | <i>KLHL17</i>   | Ns                  | Con                         |
| Chr1: 228430962                     | G > C         | Homo            | <i>OBSCN</i>    | Ns                  | LoF                         |
| Chr1: 247835881                     | C > T         | Homo            | <i>OR13G1</i>   | Ns                  | LoF                         |
| Chr16: 4935049                      | G > A         | Homo            | <i>PPL</i>      | Ns                  | LoF                         |
| Chr4: 122301586                     | T > G         | Homo            | <i>QRFPR</i>    | Ns                  | Con                         |
| Chr6: 111696550                     | T > C         | Homo            | <i>REV3L</i>    | Ns                  | Con                         |

Homo, homozygous; Sp, splicing; Ns, nonsynonymous; Con, the exact variant amino acid change occurs in other vertebrates, thus considered not conserved; LoF, the associated gene contains homozygous loss-of-function alleles in ExAC database, thus considered dispensable.

**Supplementary Table 2. Biallelic variants identified in Family 2: V-1.**

| <b>Chromosome<br/>Coordinate (hg19)</b> | <b>Change</b> | <b>Genotype</b> | <b>Gene</b>    | <b>Variant<br/>type</b> |
|-----------------------------------------|---------------|-----------------|----------------|-------------------------|
| Chr9: 80880286                          | A > G         | Homo            | <i>CEP78</i>   | Sp                      |
| Chr16: 88599697                         | A > C         | Homo            | <i>ZFPM1</i>   | Ns                      |
| Chr7: 100647511                         | C > T         | Homo            | <i>MUC12</i>   | Ns                      |
| Chr16: 70211370                         | C > G         | Homo            | <i>CLEC18C</i> | Ns                      |
| Chr3: 16926607                          | T > C         | Homo            | <i>PLCL2</i>   | Ns                      |
| Chr3: 75788260                          | C > A         | Homo            | <i>ZNF717</i>  | Ns                      |
| Chr14: 88431969                         | T > C         | Homo            | <i>GALC</i>    | Ns                      |
| Chr16: 1279060                          | C > G         | Homo            | <i>TPSB2</i>   | Ns                      |
| Chr12: 81066976                         | A > T         | Homo            | <i>PTPRQ</i>   | Ns                      |
| Chr3: 184280070                         | T > G         | Homo            | <i>EPHB3</i>   | Ns                      |
| Chr11: 123886583                        | A > G         | Homo            | <i>OR10G4</i>  | Ns                      |

Homo, homozygous; Sp, splicing; Ns, nonsynonymous;

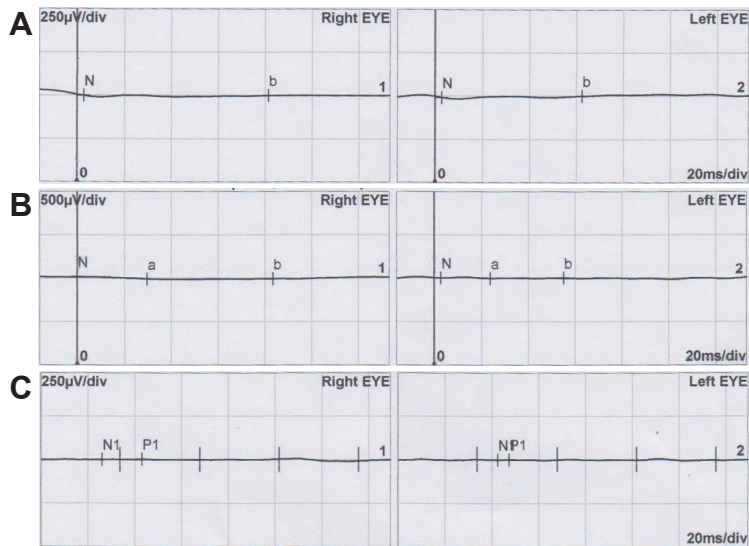

**Supplementary Figure 1. Electretinogram (ERG) data of Family 2: V-1**

The results of scotopic ERG 0.01 (A), photopic ERG 3.0 (B), flicker ERG 30Hz (C), funduscopy (D) and fluorescein angiography (E).

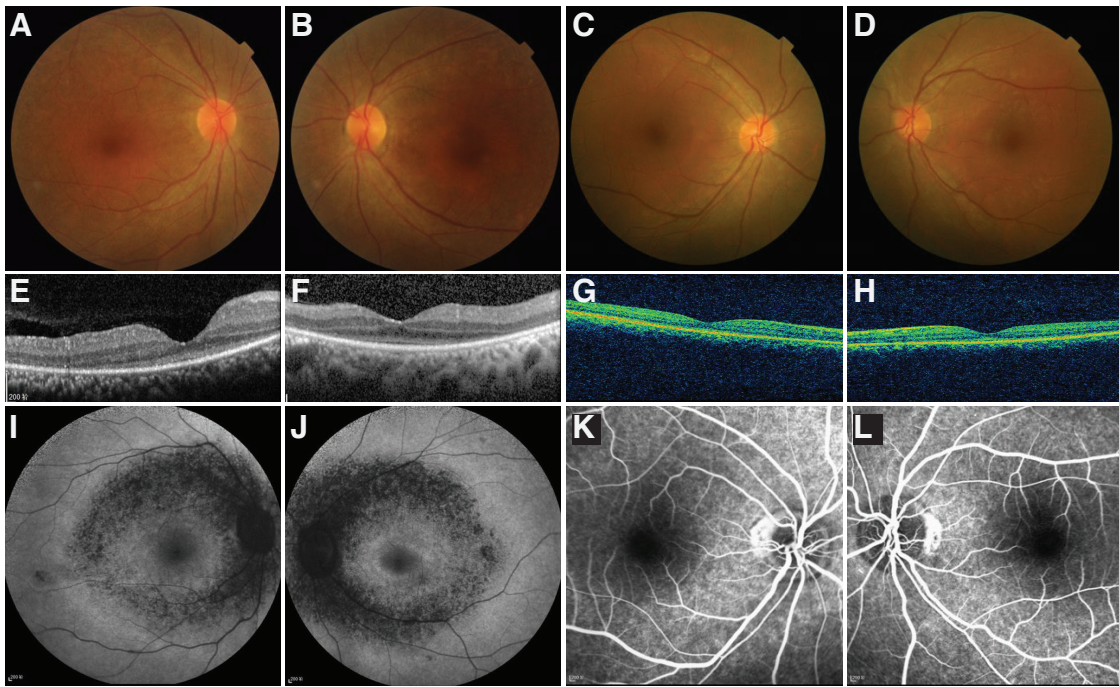

**Supplementary Figure 2. Ophthalmological findings of the Family 1:II-1 and Family 2: V-2**

Fundus images of Family 1: II-1, OD (A) and OS (B), Family 2: V-2, OD (C) and OS (D). OCT images of Family 1: II-1, OD (E) and OS (F), Family 2: V-2, OD (G) and OS (H). Fundus autofluorescence results of Family 1: II-1, OD (I) and OS (J). Fundus fluorescein angiography of Family 2: V-2, OD (K) and OS (L).

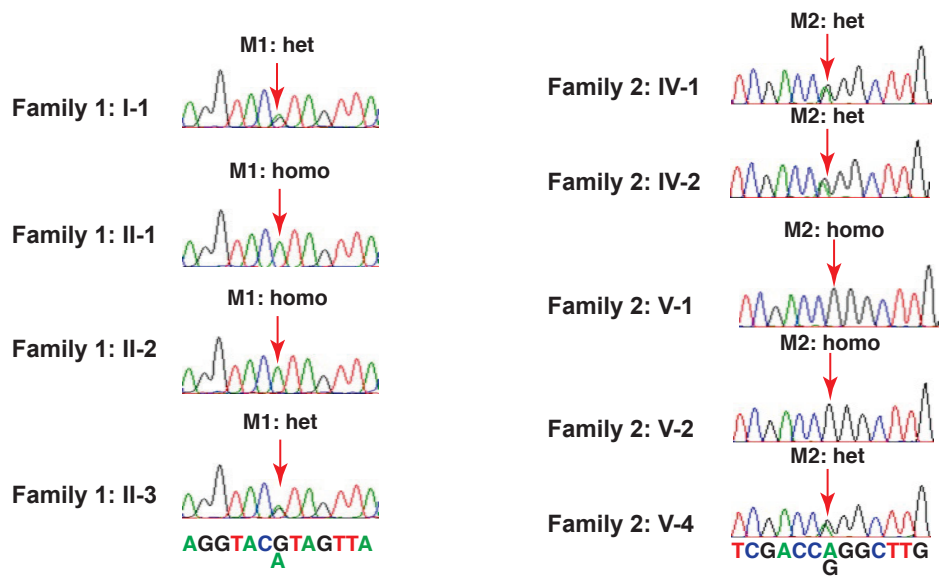

*CEP78*: NM\_032171, M1: c.1254+5G>A (p.R403Sfs\*7), M2: c.1629-2A>G (p.G545Pfs\*6)

**Supplementary Figure 3. Sanger sequencing chromatograph and co-segregation analysis.**  
Het, heterozygous; homo, homozygous.
